# Supplementary material
Source: Springer Nature journal article supplement (https://www.springermedizin.de/resource/supplementary/12906_2012_1251_MOESM4_ESM.pdf/9520040)

A)

1) Escape latency

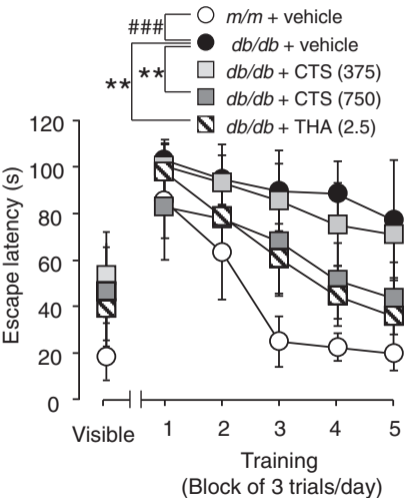

2) Swimming speed

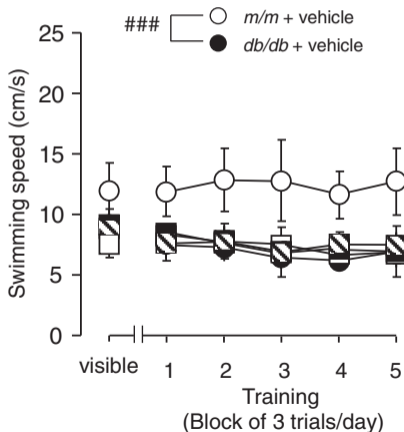

B)

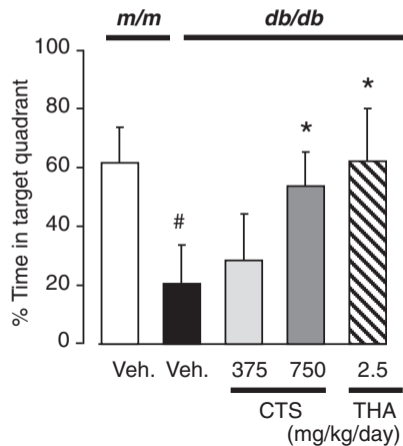

Supplement: MOESM4 [file 9520040]
